# Supplementary material for: CCSD(T) Rotational Constants for Highly Challenging C5H2 Isomers—A Comparison between Theory and Experiment
Source: MDPI journal article supplement (doi:10.3390/molecules28186537), 2023-09-09
Supplement: s1 [file s1]

# Supporting information for:

CCSD(T) Rotational Constants for Highly Challenging C<sub>5</sub>H<sub>2</sub>

Isomers—A Comparison between Theory and Experiment

Venkatesan S. Thimmakondur<sup>1,\*</sup> and Amir Karton<sup>2,\*</sup>

<sup>1</sup> Department of Chemistry and Biochemistry, San Diego State University, San Diego, CA  
92182-1030, USA

<sup>2</sup> School of Science and Technology, University of New England, Armidale, NSW 2351,  
Australia

\* Correspondence: [vthimmakondusamy@sdsu.edu](mailto:vthimmakondusamy@sdsu.edu) (V.S.T.); [amir.karton@une.edu.au](mailto:amir.karton@une.edu.au) (A.K.)

# Contents

## List of Figures

## List of Tables

|    |                                                                                                                                                                                                                                                                                        |     |
|----|----------------------------------------------------------------------------------------------------------------------------------------------------------------------------------------------------------------------------------------------------------------------------------------|-----|
| S1 | Optimized geometries of the C <sub>5</sub> H <sub>2</sub> ( <b>1-4</b> ) in their ground electronic states in Cartesian coordinates (in Ångström units) obtained at the fc-CCSD(T)/cc-pVTZ level of theory. . . . .                                                                    | S5  |
| S2 | Optimized geometries of the C <sub>5</sub> H <sub>2</sub> ( <b>5-8</b> ) in their ground electronic states in Cartesian coordinates (in Ångström units) obtained at the fc-CCSD(T)/cc-pVTZ level of theory. . . . .                                                                    | S6  |
| S3 | Optimized geometries of the C <sub>5</sub> H <sub>2</sub> ( <b>9-12</b> ) in their ground electronic states in Cartesian coordinates (in Ångström units) obtained at the fc-CCSD(T)/cc-pVTZ level of theory. . . . .                                                                   | S7  |
| S4 | Optimized geometries of the C <sub>5</sub> H <sub>2</sub> ( <b>13-15</b> ) in their ground electronic states in Cartesian coordinates (in Ångström units) obtained at the fc-CCSD(T)/cc-pVTZ level of theory. . . . .                                                                  | S8  |
| S5 | Computed energies of C <sub>5</sub> H <sub>2</sub> isomers in their ground electronic states calculated at RHF-fc-CCSD(T)/cc-pVTZ level of theory. ZPVEs are scaled by a factor of 0.9868. . . . .                                                                                     | S9  |
| S6 | Harmonic vibrational frequencies (cm <sup>-1</sup> ) and IR intensities (km mol <sup>-1</sup> ) of the triplet ground electronic state ( $\tilde{X}^3\Sigma_g^-$ ) of isomer <b>1</b> of C <sub>5</sub> H <sub>2</sub> calculated at the fc-ROCCSD(T)/cc-pVTZ level of theory. . . . . | S10 |
| S7 | Harmonic vibrational frequencies (cm <sup>-1</sup> ) and IR intensities (km mol <sup>-1</sup> ) of isomer <b>2</b> of C <sub>5</sub> H <sub>2</sub> calculated at the fc-CCSD(T)/cc-pVTZ level of theory. . .                                                                          | S11 |

|     |                                                                                                                                                                                                          |     |
|-----|----------------------------------------------------------------------------------------------------------------------------------------------------------------------------------------------------------|-----|
| S8  | Harmonic vibrational frequencies ( $\text{cm}^{-1}$ ) and IR intensities ( $\text{km mol}^{-1}$ ) of isomer <b>3</b> of $\text{C}_5\text{H}_2$ calculated at the fc-CCSD(T)/cc-pVTZ level of theory. . . | S12 |
| S9  | Harmonic vibrational frequencies ( $\text{cm}^{-1}$ ) and IR intensities ( $\text{km mol}^{-1}$ ) of isomer <b>4</b> of $\text{C}_5\text{H}_2$ calculated at the fc-CCSD(T)/cc-pVTZ level of theory. . . | S13 |
| S10 | Harmonic vibrational frequencies ( $\text{cm}^{-1}$ ) and IR intensities ( $\text{km mol}^{-1}$ ) of isomer <b>5</b> of $\text{C}_5\text{H}_2$ calculated at the fc-CCSD(T)/cc-pVTZ level of theory. . . | S14 |
| S11 | Harmonic vibrational frequencies ( $\text{cm}^{-1}$ ) and IR intensities ( $\text{km mol}^{-1}$ ) of isomer <b>6</b> of $\text{C}_5\text{H}_2$ calculated at the fc-CCSD(T)/cc-pVTZ level of theory. . . | S15 |
| S12 | Harmonic vibrational frequencies ( $\text{cm}^{-1}$ ) and IR intensities ( $\text{km mol}^{-1}$ ) of isomer <b>7</b> of $\text{C}_5\text{H}_2$ calculated at the fc-CCSD(T)/cc-pVTZ level of theory. . . | S16 |
| S13 | Harmonic vibrational frequencies ( $\text{cm}^{-1}$ ) and IR intensities ( $\text{km mol}^{-1}$ ) of isomer <b>8</b> of $\text{C}_5\text{H}_2$ calculated at the fc-CCSD(T)/cc-pVTZ level of theory. . . | S17 |
| S14 | Harmonic vibrational frequencies ( $\text{cm}^{-1}$ ) and IR intensities ( $\text{km mol}^{-1}$ ) of isomer <b>9</b> of $\text{C}_5\text{H}_2$ calculated at the fc-CCSD(T)/cc-pVTZ level of theory. . . | S18 |
| S15 | Harmonic vibrational frequencies ( $\text{cm}^{-1}$ ) and IR intensities ( $\text{km mol}^{-1}$ ) of isomer <b>10</b> of $\text{C}_5\text{H}_2$ calculated at the fc-CCSD(T)/cc-pVTZ level of theory. .  | S19 |
| S16 | Harmonic vibrational frequencies ( $\text{cm}^{-1}$ ) and IR intensities ( $\text{km mol}^{-1}$ ) of isomer <b>11</b> of $\text{C}_5\text{H}_2$ calculated at the fc-CCSD(T)/cc-pVTZ level of theory. .  | S20 |
| S17 | Harmonic vibrational frequencies ( $\text{cm}^{-1}$ ) and IR intensities ( $\text{km mol}^{-1}$ ) of isomer <b>12</b> of $\text{C}_5\text{H}_2$ calculated at the fc-CCSD(T)/cc-pVTZ level of theory. .  | S21 |
| S18 | Harmonic vibrational frequencies ( $\text{cm}^{-1}$ ) and IR intensities ( $\text{km mol}^{-1}$ ) of isomer <b>13</b> of $\text{C}_5\text{H}_2$ calculated at the fc-CCSD(T)/cc-pVTZ level of theory. .  | S22 |
| S19 | Harmonic vibrational frequencies ( $\text{cm}^{-1}$ ) and IR intensities ( $\text{km mol}^{-1}$ ) of isomer <b>14</b> of $\text{C}_5\text{H}_2$ calculated at the fc-CCSD(T)/cc-pVTZ level of theory. .  | S23 |
| S20 | Harmonic vibrational frequencies ( $\text{cm}^{-1}$ ) and IR intensities ( $\text{km mol}^{-1}$ ) of isomer <b>15</b> of $\text{C}_5\text{H}_2$ calculated at the fc-CCSD(T)/cc-pVTZ level of theory. .  | S24 |

|     |                                                                                                                                                                                                                                                                                                                                                                                                    |     |
|-----|----------------------------------------------------------------------------------------------------------------------------------------------------------------------------------------------------------------------------------------------------------------------------------------------------------------------------------------------------------------------------------------------------|-----|
| S21 | Rotational and centrifugal distortion constants (in MHz), and inertial axis dipole moment components (in Debye; $\perp^r$ representation) of isomers <b>13</b> and <b>14</b> of $C_5H_2$ calculated at the fc-CCSD(T)/cc-pVTZ level of theory. . . . .                                                                                                                                             | S25 |
| S22 | Theoretical Equilibrium Rotational Constants ( $A_e$ , $B_e$ , $C_e$ ; in MHz) Obtained at the CCSD(T) Level Using Different Basis Sets (Obtained With and Without the Frozen-Core Approximation) Along With Experimentally Measured Rotational Constants ( $A_0$ , $B_0$ , $C_0$ ; in MHz) for Isomers <b>2</b> , <b>3</b> , <b>5</b> of $C_5H_2$ (see next Table for isomer <b>8</b> ) . . . . . | S26 |
| S23 | Theoretical Equilibrium Rotational Constants ( $A_e$ , $B_e$ , $C_e$ ; in MHz) Obtained at the CCSD(T) Level Using Different Basis Sets (Obtained With and Without the Frozen-Core Approximation) Along With Experimentally Measured Rotational Constants ( $A_0$ , $B_0$ , $C_0$ ; in MHz) for Isomer <b>8</b> of $C_5H_2$ . . . . .                                                              | S27 |

Table S1: Optimized geometries of the C<sub>5</sub>H<sub>2</sub> (**1-4**) in their ground electronic states in Cartesian coordinates (in Ångström units) obtained at the fc-CCSD(T)/cc-pVTZ level of theory.

|                                                                      |           |           |           |
|----------------------------------------------------------------------|-----------|-----------|-----------|
| pentadiynylidene ( <b>1</b> ); $\tilde{X}^3\Sigma_g^-; D_{\infty h}$ |           |           |           |
| C                                                                    | 0.000000  | 0.000000  | 0.000000  |
| C                                                                    | 0.000000  | 0.000000  | -1.314136 |
| C                                                                    | 0.000000  | 0.000000  | 1.314136  |
| C                                                                    | 0.000000  | 0.000000  | -2.558916 |
| C                                                                    | 0.000000  | 0.000000  | 2.558916  |
| H                                                                    | 0.000000  | 0.000000  | -3.622994 |
| H                                                                    | 0.000000  | 0.000000  | 3.622994  |
| ethynylcyclopropenylidene ( <b>2</b> ); $\tilde{X}^1A'; C_s$         |           |           |           |
| C                                                                    | -0.348135 | 0.007666  | 0.000000  |
| C                                                                    | 1.054041  | -0.008613 | 0.000000  |
| C                                                                    | 2.267753  | -0.004875 | 0.000000  |
| H                                                                    | 3.331810  | -0.000758 | 0.000000  |
| C                                                                    | -1.565361 | 0.779726  | 0.000000  |
| C                                                                    | -1.516434 | -0.641048 | 0.000000  |
| H                                                                    | -2.044256 | -1.581135 | 0.000000  |
| pentatetraenylidene ( <b>3</b> ); $\tilde{X}^1A_1; C_{2v}$           |           |           |           |
| C                                                                    | 0.000000  | 0.000000  | -1.175733 |
| C                                                                    | 0.000000  | 0.000000  | -2.503913 |
| C                                                                    | 0.000000  | 0.000000  | 0.096131  |
| H                                                                    | 0.000000  | 0.929895  | -3.062784 |
| H                                                                    | 0.000000  | -0.929895 | -3.062784 |
| C                                                                    | 0.000000  | 0.000000  | 1.401948  |
| C                                                                    | 0.000000  | 0.000000  | 2.696024  |
| bent-pentadiynylidene ( <b>4</b> ); $\tilde{X}^1A_1; C_{2v}$         |           |           |           |
| C                                                                    | 0.000000  | -1.198855 | -0.069317 |
| C                                                                    | 0.000000  | 0.000000  | -0.740830 |
| C                                                                    | 0.000000  | 1.198855  | -0.069317 |
| C                                                                    | 0.000000  | -2.348011 | 0.370524  |
| C                                                                    | 0.000000  | 2.348011  | 0.370524  |
| H                                                                    | 0.000000  | -3.310583 | 0.824052  |
| H                                                                    | 0.000000  | 3.310583  | 0.824052  |

Table S2: Optimized geometries of the  $C_5H_2$  (**5-8**) in their ground electronic states in Cartesian coordinates (in Ångström units) obtained at the fc-CCSD(T)/cc-pVTZ level of theory.

|                                                                                  |           |           |           |
|----------------------------------------------------------------------------------|-----------|-----------|-----------|
| ethynylpropadienyldiene ( <b>5</b> ); $\tilde{X}^1A'$ ; $C_s$                    |           |           |           |
| C                                                                                | 0.082927  | -0.726052 | 0.000000  |
| H                                                                                | 0.078053  | -1.814239 | 0.000000  |
| C                                                                                | 1.253774  | -0.064853 | 0.000000  |
| C                                                                                | 2.401750  | 0.528349  | 0.000000  |
| C                                                                                | -1.185263 | -0.085879 | 0.000000  |
| C                                                                                | -2.287378 | 0.425661  | 0.000000  |
| H                                                                                | -3.243013 | 0.894715  | 0.000000  |
| buta-1,3-diynylcarbene ( <b>6</b> ); $\tilde{X}^1A'$ ; $C_s$                     |           |           |           |
| H                                                                                | -3.201132 | 0.831831  | 0.000000  |
| C                                                                                | -2.601446 | -0.080961 | 0.000000  |
| C                                                                                | -1.278515 | 0.053054  | 0.000000  |
| C                                                                                | -0.023219 | -0.068528 | 0.000000  |
| C                                                                                | 1.321958  | -0.004486 | 0.000000  |
| C                                                                                | 2.546870  | 0.025338  | 0.000000  |
| H                                                                                | 3.610147  | 0.068135  | 0.000000  |
| 1,5-cumulenebiradical form of $C_5H_2$ ( <b>7</b> ); $\tilde{X}^1A_g$ ; $C_{2h}$ |           |           |           |
| C                                                                                | 0.000000  | 0.000000  | 0.000000  |
| C                                                                                | 1.300794  | -0.053056 | 0.000000  |
| C                                                                                | -1.300794 | 0.053056  | 0.000000  |
| C                                                                                | 2.559432  | 0.083591  | 0.000000  |
| C                                                                                | -2.559432 | -0.083591 | 0.000000  |
| H                                                                                | 3.461384  | -0.498546 | 0.000000  |
| H                                                                                | -3.461384 | 0.498546  | 0.000000  |
| 2-cyclopropen-1-ylidenethenyldiene ( <b>8</b> ); $\tilde{X}^1A_1$ ; $C_{2v}$     |           |           |           |
| C                                                                                | 0.000000  | 0.000000  | 2.392509  |
| C                                                                                | 0.000000  | 0.000000  | 1.117825  |
| C                                                                                | 0.000000  | 0.000000  | -0.221601 |
| C                                                                                | 0.000000  | -0.669879 | -1.473657 |
| C                                                                                | 0.000000  | 0.669879  | -1.473657 |
| H                                                                                | 0.000000  | -1.591371 | -2.032596 |
| H                                                                                | 0.000000  | 1.591371  | -2.032596 |

Table S3: Optimized geometries of the C<sub>5</sub>H<sub>2</sub> (**9-12**) in their ground electronic states in Cartesian coordinates (in Ångström units) obtained at the fc-CCSD(T)/cc-pVTZ level of theory.

|                                                                                                                             |           |           |           |
|-----------------------------------------------------------------------------------------------------------------------------|-----------|-----------|-----------|
| 2-methylenebicyclo[1.1.0]but-1(3)-en-4-ylidene ( <b>9</b> ); $\tilde{X}^1 A_1$ ; $C_{2v}$                                   |           |           |           |
| C                                                                                                                           | 0.000000  | 0.000000  | -0.625215 |
| C                                                                                                                           | 0.000000  | 0.000000  | -1.953631 |
| C                                                                                                                           | 0.000000  | -0.769231 | 0.597650  |
| C                                                                                                                           | 0.000000  | 0.769231  | 0.597650  |
| C                                                                                                                           | 0.000000  | 0.000000  | 1.802545  |
| H                                                                                                                           | 0.000000  | 0.934979  | -2.494472 |
| H                                                                                                                           | 0.000000  | -0.934979 | -2.494472 |
| vinylidenecycloprop-1-yne ( <b>10</b> ); $\tilde{X}^1 A_1$ ; $C_{2v}$                                                       |           |           |           |
| C                                                                                                                           | 0.000000  | 0.000000  | 2.257558  |
| C                                                                                                                           | 0.000000  | 0.000000  | 0.940951  |
| C                                                                                                                           | 0.000000  | 0.000000  | -0.363926 |
| C                                                                                                                           | 0.000000  | -0.678576 | -1.653737 |
| C                                                                                                                           | 0.000000  | 0.678576  | -1.653737 |
| H                                                                                                                           | 0.000000  | 0.931120  | 2.815307  |
| H                                                                                                                           | 0.000000  | -0.931120 | 2.815307  |
| (SP-4)-spiro[2.2]pent-1,4-dien-1,4-diyl ( <b>11</b> ); $\tilde{X}^1 A_g$ ; $C_{2h}$                                         |           |           |           |
| C                                                                                                                           | 0.000000  | 0.000000  | 0.000000  |
| C                                                                                                                           | 1.258597  | 0.624555  | 0.000000  |
| C                                                                                                                           | -1.258597 | -0.624555 | 0.000000  |
| H                                                                                                                           | 1.567862  | 1.655327  | 0.000000  |
| H                                                                                                                           | -1.567862 | -1.655327 | 0.000000  |
| C                                                                                                                           | 1.438668  | -0.697891 | 0.000000  |
| C                                                                                                                           | -1.438668 | 0.697891  | 0.000000  |
| pentacyclo[2.1.0.0 <sup>1,3</sup> .0 <sup>2,5</sup> .0 <sup>3,5</sup> ]pentane ( <b>12</b> ); $\tilde{X}^1 A'_1$ ; $D_{3h}$ |           |           |           |
| C                                                                                                                           | -0.915030 | 0.000000  | 0.528293  |
| C                                                                                                                           | 0.000000  | 0.000000  | -1.056586 |
| C                                                                                                                           | 0.915030  | 0.000000  | 0.528293  |
| C                                                                                                                           | 0.000000  | -1.048972 | 0.000000  |
| C                                                                                                                           | 0.000000  | 1.048972  | 0.000000  |
| H                                                                                                                           | 0.000000  | -2.122011 | 0.000000  |
| H                                                                                                                           | 0.000000  | 2.122011  | 0.000000  |

Table S4: Optimized geometries of the C<sub>5</sub>H<sub>2</sub> (**13-15**) in their ground electronic states in Cartesian coordinates (in Ångström units) obtained at the fc-CCSD(T)/cc-pVTZ level of theory.

|                                                                                    |           |           |           |
|------------------------------------------------------------------------------------|-----------|-----------|-----------|
| (SP-4)-spiro[2.2]pent-1,4-dien-1,5-diyl ( <b>13</b> ); $\tilde{X}^1A_1$ ; $C_{2v}$ |           |           |           |
| C                                                                                  | 0.000000  | 0.000000  | 0.061467  |
| C                                                                                  | 0.000000  | -1.375953 | -0.748772 |
| C                                                                                  | 0.000000  | 1.375953  | -0.748772 |
| C                                                                                  | 0.000000  | -1.312249 | 0.585597  |
| C                                                                                  | 0.000000  | 1.312249  | 0.585597  |
| H                                                                                  | 0.000000  | -1.731610 | 1.576956  |
| H                                                                                  | 0.000000  | 1.731610  | 1.576956  |
| bicarbene ( <b>14</b> ); $\tilde{X}^1A'$ ; $C_s$                                   |           |           |           |
| C                                                                                  | -1.121593 | -0.498526 | 0.000000  |
| C                                                                                  | 0.279310  | -0.125529 | 0.000000  |
| C                                                                                  | -2.065747 | 0.424027  | 0.000000  |
| H                                                                                  | -1.446017 | -1.539061 | 0.000000  |
| C                                                                                  | 1.566213  | -0.479057 | 0.000000  |
| C                                                                                  | 1.268627  | 0.913453  | 0.000000  |
| H                                                                                  | 2.317471  | -1.251512 | 0.000000  |
| (SP-4)-spiro[2.2]pent-1-en-4-yne ( <b>15</b> ); $\tilde{X}^1A_1$ ; $C_{2v}$        |           |           |           |
| C                                                                                  | 0.000000  | 0.000000  | -0.013929 |
| C                                                                                  | 0.000000  | -0.660353 | 1.269899  |
| C                                                                                  | 0.000000  | -0.660935 | -1.412030 |
| C                                                                                  | 0.000000  | 0.660353  | 1.269899  |
| C                                                                                  | 0.000000  | 0.660935  | -1.412030 |
| H                                                                                  | 0.000000  | -1.611871 | 1.775253  |
| H                                                                                  | 0.000000  | 1.611871  | 1.775253  |



Table S5: Computed energies of C<sub>5</sub>H<sub>2</sub> isomers in their ground electronic states calculated at RHF-fc-CCSD(T)/cc-pVTZ level of theory. ZPVEs are scaled by a factor of 0.9868.

| Isomer                 | Point<br>Group | $E$<br>a.u    | ZPVE <sup>c</sup><br>kcal mol <sup>-1</sup> | $E$ +ZPVE<br>a.u | $\mu$<br>Debye | $\Delta E$<br>kcal mol <sup>-1</sup> | $\Delta E$ +ZPVE<br>kcal mol <sup>-1</sup> |
|------------------------|----------------|---------------|---------------------------------------------|------------------|----------------|--------------------------------------|--------------------------------------------|
| <b>1</b> <sup>a</sup>  | $D_{\infty h}$ | -191.13876266 | 22.7513                                     | -191.10250619    | -              | 0.0000                               | 0.0000                                     |
| <b>2</b>               | $C_s$          | -191.14181701 | 25.7176                                     | -191.10083344    | 3.5171         | -1.9166                              | 1.0497                                     |
| <b>3</b>               | $C_{2v}$       | -191.12155808 | 25.1024                                     | -191.08155490    | 5.8052         | 10.7960                              | 13.1471                                    |
| <b>4</b>               | $C_{2v}$       | -191.11584011 | 23.8331                                     | -191.07785968    | 2.0825         | 14.3841                              | 15.4659                                    |
| <b>5</b>               | $C_s$          | -191.11884515 | 25.2072                                     | -191.07867496    | 4.7439         | 12.4984                              | 14.9543                                    |
| <b>6</b>               | $C_s$          | -191.11225559 | 23.1723                                     | -191.07532818    | 2.6159         | 16.6334                              | 17.0545                                    |
| <b>7</b> <sup>c</sup>  | $C_{2h}$       | -191.10885401 | 22.4023                                     | -191.07315370    | -              | 18.7680                              | 18.4190                                    |
| <b>8</b>               | $C_{2v}$       | -191.11168476 | 25.9934                                     | -191.07026168    | 8.1297         | 16.9916                              | 20.2337                                    |
| <b>9</b>               | $C_{2v}$       | -191.10510656 | 25.8528                                     | -191.06390754    | 3.9795         | 21.1195                              | 24.2210                                    |
| <b>10</b> <sup>b</sup> | $C_{2v}$       | -191.08813420 | 24.2753                                     | -191.04944908    | 4.5629         | 31.7698                              | 33.2938                                    |
| <b>11</b>              | $C_{2h}$       | -191.07321125 | 24.2880                                     | -191.03450589    | -              | 41.1341                              | 42.6708                                    |
| <b>12</b>              | $D_{3h}$       | -191.07009916 | 26.2104                                     | -191.02833027    | -              | 43.0870                              | 46.5461                                    |
| <b>13</b>              | $C_{2v}$       | -191.06623039 | 24.1759                                     | -191.02770368    | 5.1731         | 45.5147                              | 46.9393                                    |
| <b>14</b>              | $C_s$          | -191.06476067 | 24.6738                                     | -191.02544050    | 4.4904         | 46.4369                              | 48.3595                                    |
| <b>15</b> <sup>b</sup> | $C_{2v}$       | -191.06150708 | 24.3100                                     | -191.02276666    | 5.7010         | 48.4786                              | 50.0373                                    |

<sup>a</sup> For isomer **1** the calculation is done using a ROHF wave function since the electronic state is a triplet. <sup>b</sup> Transition state. <sup>c</sup> Second-order saddle-point.

Table S6: Harmonic vibrational frequencies ( $\text{cm}^{-1}$ ) and IR intensities ( $\text{km mol}^{-1}$ ) of the triplet ground electronic state ( $\tilde{X}^3\Sigma_g^-$ ) of isomer **1** of  $\text{C}_5\text{H}_2$  calculated at the fc-ROCCSD(T)/cc-pVTZ level of theory.

| Mode | symmetry     | frequency | intensity |
|------|--------------|-----------|-----------|
| 1    | $\pi_u$      | 113.6     | 4.8       |
| 2    | $\pi_u$      | 113.6     | 4.8       |
| 3    | $\pi_u$      | 371.7     | 29.8      |
| 4    | $\pi_u$      | 371.7     | 29.8      |
| 5    | $\pi_g$      | 392.6     | 0.0       |
| 6    | $\pi_g$      | 392.6     | 0.0       |
| 7    | $\pi_g$      | 420.4     | 0.0       |
| 8    | $\pi_g$      | 420.4     | 0.0       |
| 9    | $\pi_u$      | 440.3     | 58.9      |
| 10   | $\pi_u$      | 440.3     | 58.9      |
| 11   | $\sigma_g^+$ | 745.1     | 0.0       |
| 12   | $\sigma_u^-$ | 1518.3    | 10.2      |
| 13   | $\sigma_u^-$ | 1584.3    | 4.6       |
| 14   | $\sigma_g^+$ | 1921.1    | 0.0       |
| 15   | $\sigma_u^-$ | 3435.7    | 188.4     |
| 16   | $\sigma_g^+$ | 3445.9    | 0.0       |

Table S7: Harmonic vibrational frequencies ( $\text{cm}^{-1}$ ) and IR intensities ( $\text{km mol}^{-1}$ ) of isomer **2** of  $\text{C}_5\text{H}_2$  calculated at the fc-CCSD(T)/cc-pVTZ level of theory.

| Mode | symmetry | frequency | intensity |
|------|----------|-----------|-----------|
| 1    | $a'$     | 193.0     | 5.7       |
| 2    | $a''$    | 212.9     | 0.9       |
| 3    | $a'$     | 500.1     | 2.4       |
| 4    | $a''$    | 520.4     | 1.9       |
| 5    | $a'$     | 601.8     | 49.2      |
| 6    | $a'$     | 692.1     | 1.7       |
| 7    | $a''$    | 705.4     | 28.7      |
| 8    | $a''$    | 891.2     | 17.1      |
| 9    | $a'$     | 945.8     | 2.3       |
| 10   | $a'$     | 1107.9    | 6.5       |
| 11   | $a'$     | 1269.8    | 41.2      |
| 12   | $a'$     | 1708.0    | 5.0       |
| 13   | $a'$     | 2163.8    | 10.6      |
| 14   | $a'$     | 3261.4    | 1.1       |
| 15   | $a'$     | 3457.0    | 71.1      |

Table S8: Harmonic vibrational frequencies ( $\text{cm}^{-1}$ ) and IR intensities ( $\text{km mol}^{-1}$ ) of isomer **3** of  $\text{C}_5\text{H}_2$  calculated at the fc-CCSD(T)/cc-pVTZ level of theory.

| Mode | symmetry | frequency | intensity |
|------|----------|-----------|-----------|
| 1    | $b_1$    | 122.3     | 3.1       |
| 2    | $b_2$    | 139.3     | 0.0       |
| 3    | $b_2$    | 254.9     | 5.7       |
| 4    | $b_1$    | 270.9     | 8.5       |
| 5    | $b_2$    | 445.4     | 0.9       |
| 6    | $b_1$    | 576.2     | 2.8       |
| 7    | $a_1$    | 745.5     | 0.4       |
| 8    | $b_1$    | 943.4     | 31.6      |
| 9    | $b_2$    | 1030.3    | 0.4       |
| 10   | $a_1$    | 1346.9    | 18.0      |
| 11   | $a_1$    | 1503.5    | 7.7       |
| 12   | $a_1$    | 1921.8    | 176.6     |
| 13   | $a_1$    | 2151.6    | 677.1     |
| 14   | $a_1$    | 3127.3    | 0.6       |
| 15   | $b_2$    | 3215.1    | 0.0       |

Table S9: Harmonic vibrational frequencies ( $\text{cm}^{-1}$ ) and IR intensities ( $\text{km mol}^{-1}$ ) of isomer **4** of  $\text{C}_5\text{H}_2$  calculated at the fc-CCSD(T)/cc-pVTZ level of theory.

| Mode | symmetry | frequency | intensity |
|------|----------|-----------|-----------|
| 1    | $a_1$    | 128.2     | 2.1       |
| 2    | $b_2$    | 291.1     | 27.8      |
| 3    | $b_1$    | 296.6     | 0.7       |
| 4    | $a_2$    | 305.5     | 0.0       |
| 5    | $a_1$    | 329.2     | 107.8     |
| 6    | $b_2$    | 435.8     | 2.8       |
| 7    | $a_1$    | 560.5     | 3.9       |
| 8    | $a_2$    | 768.2     | 0.0       |
| 9    | $b_1$    | 768.7     | 35.0      |
| 10   | $a_1$    | 832.1     | 2.9       |
| 11   | $b_2$    | 1274.3    | 88.2      |
| 12   | $b_2$    | 1974.3    | 186.4     |
| 13   | $a_1$    | 2025.1    | 1.2       |
| 14   | $b_2$    | 3451.2    | 109.5     |
| 15   | $a_1$    | 3453.8    | 25.8      |

Table S10: Harmonic vibrational frequencies ( $\text{cm}^{-1}$ ) and IR intensities ( $\text{km mol}^{-1}$ ) of isomer **5** of  $\text{C}_5\text{H}_2$  calculated at the fc-CCSD(T)/cc-pVTZ level of theory.

| Mode | symmetry | frequency | intensity |
|------|----------|-----------|-----------|
| 1    | $a'$     | 128.8     | 3.3       |
| 2    | $a''$    | 198.2     | 3.2       |
| 3    | $a'$     | 286.6     | 2.1       |
| 4    | $a''$    | 306.2     | 13.2      |
| 5    | $a'$     | 569.2     | 4.2       |
| 6    | $a'$     | 634.4     | 44.6      |
| 7    | $a''$    | 675.6     | 32.4      |
| 8    | $a''$    | 874.0     | 2.9       |
| 9    | $a'$     | 947.8     | 50.8      |
| 10   | $a'$     | 1149.5    | 4.8       |
| 11   | $a'$     | 1383.3    | 4.0       |
| 12   | $a'$     | 1989.5    | 582.7     |
| 13   | $a'$     | 2137.5    | 82.6      |
| 14   | $a'$     | 3133.9    | 0.6       |
| 15   | $a'$     | 3454.1    | 58.5      |

Table S11: Harmonic vibrational frequencies ( $\text{cm}^{-1}$ ) and IR intensities ( $\text{km mol}^{-1}$ ) of isomer **6** of  $\text{C}_5\text{H}_2$  calculated at the fc-CCSD(T)/cc-pVTZ level of theory.

| Mode | symmetry | frequency | intensity |
|------|----------|-----------|-----------|
| 1    | $a'$     | 66.8015   | 3.2536    |
| 2    | $a''$    | 146.0506  | 1.3678    |
| 3    | $a''$    | 320.7860  | 0.2191    |
| 4    | $a'$     | 342.1422  | 35.3010   |
| 5    | $a'$     | 391.7131  | 41.4646   |
| 6    | $a'$     | 453.2695  | 31.5590   |
| 7    | $a''$    | 582.3653  | 15.0567   |
| 8    | $a'$     | 725.7820  | 53.8401   |
| 9    | $a''$    | 731.6550  | 22.5675   |
| 10   | $a'$     | 760.0319  | 150.5521  |
| 11   | $a'$     | 1373.8075 | 2.5934    |
| 12   | $a'$     | 1898.2314 | 33.0096   |
| 13   | $a'$     | 2061.3028 | 7.3018    |
| 14   | $a'$     | 3119.3874 | 16.5238   |
| 15   | $a'$     | 3452.7960 | 109.8180  |

Table S12: Harmonic vibrational frequencies ( $\text{cm}^{-1}$ ) and IR intensities ( $\text{km mol}^{-1}$ ) of isomer **7** of  $\text{C}_5\text{H}_2$  calculated at the fc-CCSD(T)/cc-pVTZ level of theory.

| Mode | symmetry | frequency | intensity |
|------|----------|-----------|-----------|
| 1    | $b_u$    | 472.5i    | 929.5     |
| 2    | $b_u$    | 91.6i     | 4.2       |
| 3    | $a_u$    | 144.8     | 1.7       |
| 4    | $b_g$    | 320.6     | 0.0       |
| 5    | $b_u$    | 376.2     | 6.7       |
| 6    | $a_g$    | 441.3     | 0.0       |
| 7    | $a_g$    | 530.6     | 0.0       |
| 8    | $a_u$    | 590.0     | 8.0       |
| 9    | $a_g$    | 771.2     | 0.0       |
| 10   | $a_u$    | 816.5     | 28.9      |
| 11   | $b_u$    | 1500.4    | 5.7       |
| 12   | $b_u$    | 1785.7    | 23.4      |
| 13   | $a_g$    | 1941.3    | 0.0       |
| 14   | $b_u$    | 3329.4    | 43.9      |
| 15   | $a_g$    | 3332.3    | 0.0       |



Table S13: Harmonic vibrational frequencies ( $\text{cm}^{-1}$ ) and IR intensities ( $\text{km mol}^{-1}$ ) of isomer **8** of  $\text{C}_5\text{H}_2$  calculated at the fc-CCSD(T)/cc-pVTZ level of theory.

| Mode | symmetry | frequency | intensity |
|------|----------|-----------|-----------|
| 1    | $b_1$    | 147.8     | 1.4       |
| 2    | $b_2$    | 161.9     | 0.3       |
| 3    | $b_1$    | 469.7     | 10.7      |
| 4    | $b_2$    | 485.1     | 0.4       |
| 5    | $a_1$    | 726.6     | 1.8       |
| 6    | $b_1$    | 765.0     | 45.5      |
| 7    | $a_2$    | 933.1     | 0.0       |
| 8    | $b_2$    | 939.9     | 11.1      |
| 9    | $a_1$    | 978.4     | 1.9       |
| 10   | $b_2$    | 1130.2    | 12.7      |
| 11   | $a_1$    | 1445.7    | 163.7     |
| 12   | $a_1$    | 1645.6    | 36.8      |
| 13   | $a_1$    | 2051.5    | 1091.1    |
| 14   | $b_2$    | 3253.2    | 8.6       |
| 15   | $a_1$    | 3292.3    | 16.5      |

Table S14: Harmonic vibrational frequencies ( $\text{cm}^{-1}$ ) and IR intensities ( $\text{km mol}^{-1}$ ) of isomer **9** of  $\text{C}_5\text{H}_2$  calculated at the fc-CCSD(T)/cc-pVTZ level of theory.

| Mode | symmetry | frequency | intensity |
|------|----------|-----------|-----------|
| 1    | $b_1$    | 251.7     | 2.3       |
| 2    | $b_2$    | 330.4     | 0.5       |
| 3    | $b_1$    | 589.7     | 3.7       |
| 4    | $b_2$    | 617.3     | 44.9      |
| 5    | $a_2$    | 707.6     | 0.0       |
| 6    | $a_1$    | 782.7     | 0.0       |
| 7    | $b_1$    | 877.1     | 45.7      |
| 8    | $b_2$    | 952.6     | 6.0       |
| 9    | $a_1$    | 1045.5    | 6.6       |
| 10   | $b_2$    | 1064.6    | 0.8       |
| 11   | $a_1$    | 1396.3    | 68.5      |
| 12   | $a_1$    | 1453.9    | 1.4       |
| 13   | $a_1$    | 1794.5    | 27.4      |
| 14   | $a_1$    | 3180.5    | 1.9       |
| 15   | $b_2$    | 3281.7    | 0.4       |

Table S15: Harmonic vibrational frequencies ( $\text{cm}^{-1}$ ) and IR intensities ( $\text{km mol}^{-1}$ ) of isomer **10** of  $\text{C}_5\text{H}_2$  calculated at the fc-CCSD(T)/cc-pVTZ level of theory.

| Mode | symmetry | frequency | intensity |
|------|----------|-----------|-----------|
| 1    | $b_2$    | 82.7i     | 4.2       |
| 2    | $b_1$    | 204.6     | 0.0       |
| 3    | $b_2$    | 282.0     | 12.4      |
| 4    | $a_2$    | 462.7     | 0.0       |
| 5    | $b_1$    | 546.9     | 6.6       |
| 6    | $b_2$    | 602.3     | 6.3       |
| 7    | $a_1$    | 704.7     | 0.1       |
| 8    | $b_1$    | 926.5     | 36.9      |
| 9    | $b_2$    | 995.5     | 0.3       |
| 10   | $a_1$    | 1244.5    | 2.7       |
| 11   | $a_1$    | 1427.6    | 0.1       |
| 12   | $a_1$    | 1531.3    | 4.4       |
| 13   | $a_1$    | 1947.6    | 7.5       |
| 14   | $a_1$    | 3123.5    | 0.0       |
| 15   | $b_2$    | 3208.3    | 0.7       |

Table S16: Harmonic vibrational frequencies ( $\text{cm}^{-1}$ ) and IR intensities ( $\text{km mol}^{-1}$ ) of isomer **11** of  $\text{C}_5\text{H}_2$  calculated at the fc-CCSD(T)/cc-pVTZ level of theory.

| Mode | symmetry | frequency | intensity |
|------|----------|-----------|-----------|
| 1    | $b_u$    | 164.1     | 49.9      |
| 2    | $a_u$    | 232.9     | 23.2      |
| 3    | $b_u$    | 419.4     | 40.4      |
| 4    | $a_u$    | 450.4     | 3.4       |
| 5    | $a_g$    | 542.2     | 0.0       |
| 6    | $b_g$    | 749.6     | 0.0       |
| 7    | $a_u$    | 819.6     | 59.2      |
| 8    | $a_g$    | 839.7     | 0.0       |
| 9    | $b_u$    | 959.2     | 10.2      |
| 10   | $a_g$    | 1065.4    | 0.0       |
| 11   | $b_u$    | 1139.2    | 26.7      |
| 12   | $a_g$    | 1576.2    | 0.0       |
| 13   | $b_u$    | 1680.3    | 4.9       |
| 14   | $a_g$    | 3288.2    | 0.0       |
| 15   | $b_u$    | 3290.6    | 24.5      |

Table S17: Harmonic vibrational frequencies ( $\text{cm}^{-1}$ ) and IR intensities ( $\text{km mol}^{-1}$ ) of isomer **12** of  $\text{C}_5\text{H}_2$  calculated at the fc-CCSD(T)/cc-pVTZ level of theory.

| Mode | symmetry | frequency | intensity |
|------|----------|-----------|-----------|
| 1    | $e'$     | 490.7     | 49.9      |
| 2    | $e'$     | 490.7     | 49.9      |
| 3    | $e''$    | 777.1     | 0.0       |
| 4    | $e''$    | 777.1     | 0.0       |
| 5    | $e'$     | 839.4     | 20.4      |
| 6    | $e'$     | 839.4     | 20.4      |
| 7    | $a1'$    | 846.8     | 0.0       |
| 8    | $e''$    | 1011.5    | 0.0       |
| 9    | $e''$    | 1011.5    | 0.0       |
| 10   | $e'$     | 1129.0    | 8.3       |
| 11   | $e'$     | 1129.0    | 8.3       |
| 12   | $a2''$   | 1276.2    | 19.6      |
| 13   | $a1'$    | 1299.7    | 0.0       |
| 14   | $a2''$   | 3330.0    | 12.3      |
| 15   | $a1'$    | 3331.6    | 0.0       |

Table S18: Harmonic vibrational frequencies ( $\text{cm}^{-1}$ ) and IR intensities ( $\text{km mol}^{-1}$ ) of isomer **13** of  $\text{C}_5\text{H}_2$  calculated at the fc-CCSD(T)/cc-pVTZ level of theory.

| Mode | symmetry | frequency | intensity |
|------|----------|-----------|-----------|
| 1    | $a_2$    | 207.5     | 0.0       |
| 2    | $a_1$    | 244.1     | 2.3       |
| 3    | $b_2$    | 321.0     | 23.6      |
| 4    | $b_1$    | 444.3     | 4.2       |
| 5    | $a_1$    | 593.3     | 13.2      |
| 6    | $a_2$    | 758.3     | 0.0       |
| 7    | $b_1$    | 791.5     | 56.4      |
| 8    | $b_2$    | 944.3     | 4.2       |
| 9    | $a_1$    | 975.1     | 37.5      |
| 10   | $b_2$    | 1013.7    | 11.5      |
| 11   | $a_1$    | 1064.7    | 4.7       |
| 12   | $a_1$    | 1571.2    | 31.2      |
| 13   | $b_2$    | 1643.5    | 1.6       |
| 14   | $a_1$    | 3280.2    | 14.9      |
| 15   | $b_2$    | 3284.6    | 0.7       |

Table S19: Harmonic vibrational frequencies ( $\text{cm}^{-1}$ ) and IR intensities ( $\text{km mol}^{-1}$ ) of isomer **14** of  $\text{C}_5\text{H}_2$  calculated at the fc-CCSD(T)/cc-pVTZ level of theory.

| Mode | symmetry | frequency | intensity |
|------|----------|-----------|-----------|
| 1    | $a''$    | 104.1     | 0.0       |
| 2    | $a'$     | 110.6     | 7.9       |
| 3    | $a'$     | 341.5     | 11.5      |
| 4    | $a''$    | 402.7     | 1.9       |
| 5    | $a''$    | 709.8     | 21.0      |
| 6    | $a'$     | 748.6     | 0.1       |
| 7    | $a''$    | 891.0     | 17.2      |
| 8    | $a'$     | 934.6     | 4.1       |
| 9    | $a'$     | 997.6     | 9.3       |
| 10   | $a'$     | 1172.5    | 35.2      |
| 11   | $a'$     | 1288.7    | 34.4      |
| 12   | $a'$     | 1637.3    | 52.3      |
| 13   | $a'$     | 1756.9    | 104.9     |
| 14   | $a'$     | 3127.7    | 20.0      |
| 15   | $a'$     | 3267.1    | 1.6       |

Table S20: Harmonic vibrational frequencies ( $\text{cm}^{-1}$ ) and IR intensities ( $\text{km mol}^{-1}$ ) of isomer **15** of  $\text{C}_5\text{H}_2$  calculated at the fc-CCSD(T)/cc-pVTZ level of theory.

| Mode | symmetry | frequency | intensity |
|------|----------|-----------|-----------|
| 1    | $b_2$    | 236.3i    | 0.1       |
| 2    | $a_2$    | 115.9     | 0.0       |
| 3    | $b_1$    | 427.1     | 4.3       |
| 4    | $b_2$    | 468.2     | 0.0       |
| 5    | $a_1$    | 664.5     | 9.2       |
| 6    | $b_1$    | 757.2     | 45.5      |
| 7    | $b_2$    | 879.7     | 0.0       |
| 8    | $a_2$    | 898.0     | 0.0       |
| 9    | $a_1$    | 971.8     | 2.5       |
| 10   | $b_2$    | 1043.8    | 26.2      |
| 11   | $a_1$    | 1172.2    | 107.4     |
| 12   | $a_1$    | 1624.6    | 1.8       |
| 13   | $a_1$    | 1656.9    | 34.4      |
| 14   | $b_2$    | 3252.6    | 9.3       |
| 15   | $a_1$    | 3300.2    | 7.3       |



Table S21: Rotational and centrifugal distortion constants (in MHz), and inertial axis dipole moment components (in Debye;  $\perp^r$  representation) of isomers **13** and **14** of  $\text{C}_5\text{H}_2$  calculated at the fc-CCSD(T)/cc-pVTZ level of theory.

| Isomer <sup>a</sup> | $A_e$    | $B_e$   | $C_e$   | $\Delta_J$              | $\Delta_K$               | $\Delta_{JK}$            | $\delta_J$               | $\delta_K$               | $\mu_a$ | $\mu_b$ | $ \mu $ |
|---------------------|----------|---------|---------|-------------------------|--------------------------|--------------------------|--------------------------|--------------------------|---------|---------|---------|
| <b>13</b>           | 18897.05 | 5445.32 | 4227.22 | $0.1185 \times 10^{-2}$ | $-0.9819 \times 10^{-2}$ | $0.2280 \times 10^{-1}$  | $0.2785 \times 10^{-3}$  | $0.1402 \times 10^{-1}$  | 5.1731  | -       | 5.1731  |
| <b>14</b>           | 22907.74 | 4091.85 | 3471.72 | $0.5571 \times 10^{-2}$ | 0.5168                   | $-0.8922 \times 10^{-1}$ | $-0.1446 \times 10^{-2}$ | $-0.6344 \times 10^{-4}$ | 0.0164  | -4.4903 | 4.4903  |

<sup>a</sup> For isomers **1-9**, please see *J. Phys. Chem. A* **2019**, 123, 6618-6627. It is noted here that isomers **10** and **15** are transition states whereas isomer **7** is a second-order saddle point. Therefore, spectroscopic parameters for these systems are not given. For isomers **11** and **12**, there is no permanent dipole. Thus, they are not suitable molecules for rotational spectroscopy. <sup>b</sup> Centrifugal distortion constants are from the S-reduced Hamiltonian for **14** considering the fact that it is approaching close to the prolate limit.

Table S22: Theoretical Equilibrium Rotational Constants ( $A_e$ ,  $B_e$ ,  $C_e$ ; in MHz) Obtained at the CCSD(T) Level Using Different Basis Sets (Obtained With and Without the Frozen-Core Approximation) Along With Experimentally Measured Rotational Constants ( $A_0$ ,  $B_0$ ,  $C_0$ ; in MHz) for Isomers **2**, **3**, **5** of C<sub>5</sub>H<sub>2</sub> (see next Table for isomer **8**)

| Isomer   | Level of theory                | Rotational constants |         |         | % Error |       |       |
|----------|--------------------------------|----------------------|---------|---------|---------|-------|-------|
|          |                                | $A_e$                | $B_e$   | $C_e$   |         |       |       |
| <b>2</b> | Semi-Experimental <sup>e</sup> | 36972.92             | 3448.64 | 3154.31 | -       | -     | -     |
|          | PBE-D3BJ                       | 34776.97             | 3410.30 | 3105.75 | 6.31    | 1.12  | 1.56  |
|          | BLYP-D3BJ                      | 34772.95             | 3406.65 | 3102.68 | 6.33    | 1.23  | 1.66  |
|          | M06-L                          | 35357.19             | 3460.34 | 3151.87 | 4.57    | -0.34 | 0.08  |
|          | TPSS-D3BJ                      | 34832.08             | 3421.18 | 3115.20 | 6.15    | 0.80  | 1.26  |
|          | B3LYP-D3BJ                     | 35276.94             | 3450.69 | 3143.23 | 4.81    | -0.06 | 0.35  |
|          | PBE0-D3                        | 35266.57             | 3452.84 | 3144.93 | 4.84    | -0.12 | 0.30  |
|          | BMK-D3BJ                       | 34305.88             | 3417.45 | 3107.86 | 7.77    | 0.91  | 1.49  |
|          | M06-2X                         | 35256.00             | 3448.04 | 3140.87 | 4.87    | 0.02  | 0.43  |
|          | $\omega$ B97X-D                | 35291.05             | 3455.20 | 3147.08 | 4.77    | -0.19 | 0.23  |
|          | CAM-B3LYP-D3BJ                 | 35545.72             | 3467.14 | 3159.01 | 4.02    | -0.53 | -0.15 |
|          | B2-PLYP-D3BJ                   | 35080.47             | 3437.28 | 3130.54 | 5.39    | 0.33  | 0.76  |
|          | DSD-PBEP86-D3BJ                | 34906.49             | 3425.77 | 3119.61 | 5.92    | 0.67  | 1.11  |
| <b>3</b> | Semi-Experimental <sup>e</sup> | 231551.05            | 2216.88 | 2283.64 | -       | -     | -     |
|          | PBE-D3BJ                       | 288084.24            | 2289.71 | 2271.66 | N/A     | -3.18 | 0.53  |
|          | BLYP-D3BJ                      | 290215.02            | 2292.37 | 2274.41 | N/A     | -3.29 | 0.41  |
|          | M06-L                          | 294818.00            | 2323.38 | 2305.21 | N/A     | -4.58 | -0.94 |
|          | TPSS-D3BJ                      | 291046.32            | 2299.95 | 2281.92 | N/A     | -3.61 | 0.08  |
|          | B3LYP-D3BJ                     | 293043.81            | 2325.07 | 2306.77 | N/A     | -4.65 | -1.00 |
|          | PBE0-D3                        | 290928.94            | 2323.77 | 2305.36 | N/A     | -4.60 | -0.94 |
|          | BMK-D3BJ                       | 290741.94            | 2324.26 | 2305.82 | N/A     | -4.62 | -0.96 |
|          | M06-2X                         | 291808.85            | 2325.92 | 2307.52 | N/A     | -4.69 | -1.03 |
|          | $\omega$ B97X-D                | 291451.07            | 2332.41 | 2313.89 | N/A     | -4.95 | -1.31 |
|          | CAM-B3LYP-D3BJ                 | 292506.42            | 2342.33 | 2323.72 | N/A     | -5.36 | -1.72 |
|          | B2-PLYP-D3BJ                   | 293012.38            | 2313.86 | 2295.74 | N/A     | -4.19 | -0.53 |
|          | DSD-PBEP86-D3BJ                | 291090.37            | 2305.76 | 2287.64 | N/A     | -3.85 | -0.17 |
| <b>5</b> | Semi-Experimental <sup>e</sup> | 31151.23             | 2863.13 | 2621.54 | -       | -     | -     |
|          | PBE-D3BJ                       | 31828.92             | 2844.85 | 2611.44 | -2.13   | 0.64  | 0.39  |
|          | BLYP-D3BJ                      | 31858.95             | 2844.08 | 2610.99 | -2.22   | 0.67  | 0.40  |
|          | M06-L                          | 32808.78             | 2871.76 | 2640.62 | -5.05   | -0.30 | -0.72 |
|          | TPSS-D3BJ                      | 31747.91             | 2858.87 | 2622.70 | -1.88   | 0.15  | -0.04 |
|          | B3LYP-D3BJ                     | 32319.76             | 2881.41 | 2645.55 | -3.62   | -0.63 | -0.91 |
|          | PBE0-D3                        | 32255.27             | 2883.33 | 2646.73 | -3.42   | -0.70 | -0.95 |
|          | BMK-D3BJ                       | 31631.84             | 2889.51 | 2647.65 | -1.52   | -0.91 | -0.99 |
|          | M06-2X                         | 31802.01             | 2890.22 | 2649.44 | -2.05   | -0.94 | -1.05 |
|          | $\omega$ B97X-D                | 31949.95             | 2893.95 | 2653.59 | -2.50   | -1.06 | -1.21 |
|          | CAM-B3LYP-D3BJ                 | 32265.81             | 2902.36 | 2662.84 | -3.45   | -1.35 | -1.55 |
|          | B2-PLYP-D3BJ                   | 31903.20             | 2873.29 | 2635.89 | -2.36   | -0.35 | -0.54 |
|          | DSD-PBEP86-D3BJ                | 31573.48             | 2867.58 | 2628.82 | -1.34   | -0.16 | -0.28 |
|          |                                | S <sub>26</sub>      |         |         |         |       |       |
|          | Measured <sup>d</sup>          | 31979(6)             | 3530.13 | 3176.84 | -       | -     | -     |

Table S23: Theoretical Equilibrium Rotational Constants ( $A_e$ ,  $B_e$ ,  $C_e$ ; in MHz) Obtained at the CCSD(T) Level Using Different Basis Sets (Obtained With and Without the Frozen-Core Approximation) Along With Experimentally Measured Rotational Constants ( $A_0$ ,  $B_0$ ,  $C_0$ ; in MHz) for Isomer **8** of  $C_5H_2$

| Isomer   | Level of theory                | Rotational constants |         |         | % Error |       |       |
|----------|--------------------------------|----------------------|---------|---------|---------|-------|-------|
|          |                                | $A_e$                | $B_e$   | $C_e$   |         |       |       |
| <b>8</b> | Semi-Experimental <sup>e</sup> | 34494.31             | 3515.75 | 3202.60 | -       | -     | -     |
|          | PBE-D3BJ                       | 31895.10             | 3495.39 | 3150.17 | 8.15    | 0.58  | 1.66  |
|          | BLYP-D3BJ                      | 31951.11             | 3492.37 | 3148.26 | 7.96    | 0.67  | 1.73  |
|          | M06-L                          | 32469.73             | 3550.52 | 3200.55 | 6.24    | -0.98 | 0.06  |
|          | TPSS-D3BJ                      | 32043.94             | 3507.76 | 3161.66 | 7.65    | 0.23  | 1.29  |
|          | B3LYP-D3BJ                     | 32383.88             | 3549.26 | 3198.69 | 6.52    | -0.94 | 0.12  |
|          | PBE0-D3                        | 32335.21             | 3554.21 | 3202.23 | 6.68    | -1.08 | 0.01  |
|          | BMK-D3BJ                       | 31945.51             | 3514.90 | 3166.50 | 7.98    | 0.02  | 1.14  |
|          | M06-2X                         | 32409.92             | 3557.06 | 3205.27 | 6.43    | -1.16 | -0.08 |
|          | $\omega$ B97X-D                | 32460.20             | 3561.98 | 3209.76 | 6.27    | -1.30 | -0.22 |
|          | CAM-B3LYP-D3BJ                 | 32576.31             | 3580.04 | 3225.56 | 5.89    | -1.80 | -0.71 |
|          | B2-PLYP-D3BJ                   | 32223.32             | 3538.94 | 3188.73 | 7.05    | -0.66 | 0.43  |
|          | DSD-PBEP86-D3BJ                | 32086.32             | 3531.32 | 3181.20 | 7.50    | -0.44 | 0.67  |

<sup>a</sup> Experimental  $A_0$ ,  $B_0$ , and  $C_0$  values are converted to semi-experimental  $A_e$ ,  $B_e$ , and  $C_e$  values using vibrational corrections calculated at the B3LYP/jun-cc-pVTZ level of theory.

<sup>b</sup> Experimental  $A_0$ ,  $B_0$ , and  $C_0$  values are converted to semi-experimental  $A_e$ ,  $B_e$ , and  $C_e$  values using vibrational corrections calculated at the B3LYP/jun-cc-pVTZ level of theory.

<sup>c</sup> This is not a measured value. This value has been derived assuming a planar structure, that is,  $1/C - 1/A - 1/B = 0$ . <sup>d</sup> Experimental  $A_0$ ,  $B_0$ , and  $C_0$  values are converted to semi-experimental  $A_e$ ,  $B_e$ , and  $C_e$  values using vibrational corrections calculated at the B3LYP/jun-cc-pVTZ level of theory.
